# Supplementary material for: Overexpression of a Thermostable α-Amylase through Genome Integration in Bacillus subtilis
Source: MDPI journal article supplement (doi:10.3390/fermentation9020139), 2023-01-31
Supplement: s1 [file s1]

**Table S1.** Primers used in this study.

| Primer name      | Sequence (5'-3')                                              |
|------------------|---------------------------------------------------------------|
| pMA0911-BLA702-F | GCAGCCGCACCGTTTAACGG                                          |
| pMA0911-BLA702-R | ATGTAAATCGCTCCTTTTATAGGTGGC                                   |
| SP-F             | GCCACCTAAAAAGGAGCGATTACATATGTTGATCAACAAAAGCA<br>AAAAGTTTTTC   |
| SP-R             | CCGTAAACGGTGCGGCTGCGGCTTTTGCAACTTCCCCATTC                     |
| LipA-F           | GCCACCTAAAAAGGAGCGATTACATATGAAATTTGTGAAACGCA<br>GAATTATTGCG   |
| LipA-R           | CCGTAAACGGTGCGGCTGCCGCTTTCGCGCTCGGTTG                         |
| YncM-F           | GCCACCTAAAAAGGAGCGATTACATATGGCTAAACCGCTGTCAA<br>AAGG          |
| YncM-R           | CCGTAAACGGTGCGGCTGCCGCATCAGCTGCTGGCAG                         |
| CBM68-F          | CCTAAAAAGGAGCGATTACATATGCCCCCAAAACAACAGTCG                    |
| CBM68-R          | CCGTAAACGGTGCGGCTGCACCAAGATCATTTCCGTCATATGCA<br>TAC           |
| pMA0911-F        | GAATTCGTCGACAAGCTTGGTACC                                      |
| pMA0911-R        | ATGTAAATCGCTCCTTTTATAGGTGGC                                   |
| 0046ytnA-F       | GCCACCTAAAAAGGAGCGATTACATATGCAAAAACAAAACAA<br>GAGCTGCAC       |
| 0046ytnA-R       | GGTACCAAGCTTGTCGACGAATTCTCAGCTGATATTCGTTTCGCT<br>GGC          |
| 0572comEA-F      | GCCACCTAAAAAGGAGCGATTACATATGAATTGGTTGAATCAGC<br>ATAAGAAAGC    |
| 0572comEA-R      | GGTACCAAGCTTGTCGACGAATTCTCACTTTACTGTAATGGAAGA<br>CTTTATTTTCTC |
| 1521motA-F       | CCACCTAAAAAGGAGCGATTACATATGGATAAACTTCGTTAAT<br>CGGTATTATTCTTG |
| 1521motA-R       | GGTACCAAGCTTGTCGACGAATTCTCATGCTTCTTCTCTTTTTTC<br>TCGCC        |
| 1951crh-F        | GCCACCTAAAAAGGAGCGATTACATATGGTTCAACAGAAAGTG<br>GAAGTTCG       |
| 1951crh-R        | GGTACCAAGCTTGTCGACGAATTCCTAACTTCTTCTTGAACGTA<br>AGCAGCC       |
| 2143SpoIIQ-F     | GCCACCTAAAAAGGAGCGATTACATATGAGAGAGGAAGAAAAG<br>AAAACCTCTCAAG  |
| 2143SpoIIQ-R     | GGTACCAAGCTTGTCGACGAATTCTTAAGACTGTTCAAGTGTCTTC<br>TGTTGTGC    |
| pDG1730-F        | GGGCAAGGCTAGACGGGAC                                           |
| pDG1730-R        | TCTTGACACTCCTTATTGATTTTTTG                                    |
| 1730-amyE-up1    | CAAAAAATCAAATAAGGAGTGCAAGAATGTTTGCAAAACGATT<br>CAAAACCTC      |

|                  |                                                                      |
|------------------|----------------------------------------------------------------------|
| 1730-amyE-up2    | CTTTTTCATATCCTGATATCGGCCGAAGCTTCTAGGATCCGATCAG<br>ACCAG              |
| BLA702-F         | CGGCCGATATCAGGATATGAAAAAG                                            |
| BLA702-R         | GGCGCGCCAAACTGGACAC                                                  |
| Spc-F            | GTGTCCAGTTTGGCGGCCATCGAATTCCTGCAGCCCTG                               |
| Spc-R            | GATCCCCCTATGCAAGGGTTTATTG                                            |
| 1730-amyE-down-F | CAATAAACCCCTTGCATAGGGGGATCTCGACATGGATGAGCGATGA<br>TG                 |
| 1730-amyE-down-R | GTCCCGTCTAGCCTTGCCCTCAATGGGGAAGAGAACCGCTTAAG                         |
| 1730-nprB-up-F   | CAAAAAATCAAATAAGGAGTGTCAAGAGTTTTCCCTTAAACAA<br>ATATTTGAACACGATTTTGGC |
| 1730-nprB-up-R   | CTTTTTCATATCCTGATATCGGCCGGCAAACAAAAACAGTCAGGA<br>CAC                 |
| 1730-NprB-down-F | CAATAAACCCCTTGCATAGGGGGATCATGAAAACGAATCAAGTTAA<br>TGACCGC            |
| 1730-NprB-down-R | GTCCCGTCTAGCCTTGCCCAACACCACATCCTTCCTATTTTGAAT<br>CTACC               |
| PrsA-F           | CAACCGAGCGCGAAAGCGATGAAGAAAATCGCAATAGCAGCTAT<br>CAC                  |
| PrsA-R           | GGTACCAAGCTTGTGCGACGAATTCTTATTTAGAATTGCTTGAAGA<br>TGAAGAAGTGCTG      |
| pMA0911-LipA-F   | GAATTCGTCGACAAGCTTGGTACC                                             |
| pMA0911-LipA-R   | CGCTTTCGCGCTCGGTTG                                                   |
| Test-pMA0911-F   | CCGTTACACTAGAAAACCGAAAGAC                                            |
| Test-pMA0911-R   | TCATCACCGAAACGCGCG                                                   |
| Test-pDG1730-F   | GGGTGAGCAAAAACAGGAAGG                                                |
| Test-pDG1730-R   | GCCGGAAGCGAGAAGAATC                                                  |

**Table S2. Macromolecular protein transporters in this study.**

| Numbers | Gene name     | Functional description               |
|---------|---------------|--------------------------------------|
| 0127    | <i>ytxE</i>   | ABC transporter ATP-binding protein  |
| 0059    | <i>ytrF</i>   | ABC transporter permease             |
| 4127    | <i>trpP</i>   | tryptophan transporter               |
| 3624    | <i>gabP</i>   | GABA permease                        |
| 1239    | <i>fliP</i>   | flagellar biosynthesis protein       |
| 3363    | <i>thiT</i>   | energy-coupled thiamine transporter  |
| 2619    | <i>yyaD</i>   | putative transporter                 |
| 1522    | <i>motB-2</i> | hypothetical protein                 |
| 1238    | <i>fliQ</i>   | flagellar biosynthesis protein       |
| 1235    | <i>flhA</i>   | flagellar biosynthesis protein       |
| 1945    | <i>yvcS</i>   | lantibiotic ABC transporter permease |
| 1878    | <i>sipV</i>   | type I signal peptidase              |
| 1819    | <i>yitP</i>   | hypothetical protein                 |
| 4131    | <i>ecsB</i>   | ABC transporter permease             |

|      |               |                                                                                |
|------|---------------|--------------------------------------------------------------------------------|
| 1237 | <i>fliR</i>   | flagellar biosynthesis protein FliR                                            |
| 1254 | <i>fliF</i>   | flagellar basal-body MS-ring/collar protein                                    |
| 0062 | <i>bceA</i>   | bacitracin ABC transporter ATP-binding protein                                 |
| 3115 | <i>yvrO</i>   | putative ABC transporter (ATP-binding protein)                                 |
| 0750 | <i>oxaAB</i>  | Sec-independent factor for membrane protein insertion                          |
| 1236 | <i>flhB</i>   | flagellar biosynthesis protein                                                 |
| 1087 | <i>yndE</i>   | putative spore germination integral inner membrane protein                     |
| 4229 | <i>ydgF</i>   | putative amino acid permease                                                   |
| 3467 | <i>yfkT</i>   | putative spore germination integral inner membrane transporter                 |
| 2907 | <i>tatD</i>   | 3' -> 5' ssDNA/RNA exonuclease                                                 |
| 2790 | <i>yclH</i>   | putative ABC transporter (ATPase component)                                    |
| 1571 | <i>thiV</i>   | thiamine transporter, permease component                                       |
| 1820 | <i>yitO</i>   | putative integral inner membrane protein with HTTM domain                      |
| 2791 | <i>gerKB</i>  | spore germination receptor subunit                                             |
| 2858 | <i>ycgH</i>   | putative amino acid transporter                                                |
| 0058 | <i>ytrE</i>   | ABC transporter ATP-binding protein                                            |
| 2968 | <i>ybxG</i>   | putative amino acid permease                                                   |
| 0063 | <i>bceB</i>   | ABC transporter (permease)                                                     |
| 2936 | <i>ybgB</i>   | conserved protein of unknown function                                          |
| 2200 | <i>ywkB</i>   | putative metabolite transporter                                                |
| 2477 | <i>yxdL</i>   | ABC transporter ATP-binding protein                                            |
| 2066 | <i>glrBB</i>  | glycine receptor, beta b                                                       |
| 1447 | <i>yknY-2</i> | ABC transporter ATP-binding protein                                            |
| 1682 | <i>yjka</i>   | putative ABC transporter (permease)                                            |
| 3139 | <i>gerAB</i>  | component of the germination receptor GerA; putative transporter               |
| 2476 | <i>yxdM</i>   | ABC transporter permease                                                       |
| 0168 | <i>secDF</i>  | protein translocase subunit                                                    |
| 2381 | <i>cydD</i>   | thiol reductant ABC exporter subunit                                           |
| 3063 | <i>sdpB</i>   | export step of killing factor                                                  |
| 0099 | <i>pomA</i>   | proline-specific permease                                                      |
| 2978 | <i>skfF</i>   | sporulation killing factor biosynthesis and export; ABC transporter (permease) |
| 3038 | <i>yvbW</i>   | putative leucine permease                                                      |
| 1521 | <i>motA</i>   | flagellar motor protein                                                        |
| 1951 | <i>crh</i>    | corticotropin releasing hormone                                                |
| 2143 | <i>spoIIQ</i> | stage II sporulation protein                                                   |
| 0572 | <i>comEA</i>  | membrane bound high-affinity DNA-binding receptor                              |
| 0046 | <i>ytnA</i>   | putative amino acid permease                                                   |

**Table S3. The N20 sequences of the macromolecular protein transporters.**

| Numbers | Gene name   | N20 sequence (5' - 3' )   |
|---------|-------------|---------------------------|
| 0127    | <i>ytxE</i> | ATGTGCAAAAATTCAAAGCGGCAG  |
| 0059    | <i>ytrF</i> | AAACTTCCATCAAGAACATTTCGGC |

---

|      |               |                           |
|------|---------------|---------------------------|
| 4127 | <i>trpP</i>   | ATCTTGCAAAATGTACTCGTCATC  |
| 3624 | <i>gabP</i>   | ATGTGCGCCATACAACGGATCTGG  |
| 1239 | <i>fliP</i>   | ATGTGCAATCTATGCCCCAAACC   |
| 3363 | <i>thiT</i>   | AAACAGTTTCCGATTGCTATTTGT  |
| 2619 | <i>yyaD</i>   | AAACAGCTTCCTTTCTGGTGGGGA  |
| 1522 | <i>motB-2</i> | ATGTAGGCCGAAGCAAAAACCGGC  |
| 1238 | <i>fliQ</i>   | ATGTTCAAATCCAGGAACAGACTT  |
| 1235 | <i>flhA</i>   | ATGTGTCAGTTGGCTTTGGAATC   |
| 1945 | <i>yvcS</i>   | ATGTTTTCAGTCAGACTTGCCGTA  |
| 1878 | <i>sipV</i>   | ATGTCCAGGAAGGAAACGAATTGT  |
| 1819 | <i>yitP</i>   | ATGTGCCAAGTCGGCAAGGAACAG  |
| 4131 | <i>ecsB</i>   | ATGTGACGAAAGCAGCGTTTCTAT  |
| 1237 | <i>fliR</i>   | ATGTGATCAGGCATTTCC6AATTT  |
| 1254 | <i>fliF</i>   | ATGTTGCCACAGCGGGATACCTG   |
| 0062 | <i>bceA</i>   | ATGTCAGAAGCAGAGAACATCCGC  |
| 3115 | <i>yvrO</i>   | ATGTAGCAGCGGGTGGCGATAGCG  |
| 0750 | <i>oxaAB</i>  | ATGTTTCAGTCTCCGATTATGATT  |
| 1236 | <i>flhB</i>   | ATGTGACAGCGGGAAATGGCGATG  |
| 1087 | <i>yndE</i>   | ATGTCCCGACATATTGTAGGAAAA  |
| 4229 | <i>ydgF</i>   | ATGTCTACAAGTATTTGTCTGCTGT |
| 3467 | <i>yfkT</i>   | ATGTTCCAAAAAGCCGCGATGATC  |
| 2907 | <i>tatD</i>   | AAACACAGGACATTTATGACTGGC  |
| 2790 | <i>yelH</i>   | ATGTAGCAGCGGGTATCAATTACA  |
| 1571 | <i>thiV</i>   | ATGTTGTTCAAGGGCTCGGGGCTG  |
| 1820 | <i>yitO</i>   | ATGTTCTCAGCAGGAATGGGTGGA  |
| 2791 | <i>gerKB</i>  | ATGTTCTCAATTGGCTTATCCGAT  |
| 2858 | <i>ycgH</i>   | ATGTCCCGAAAAGCATTTCGGCAAA |
| 0058 | <i>ytrE</i>   | ATGTTCAGAGCTTTTCAGCTCATCC |
| 2968 | <i>ybxG</i>   | ATGTATCAAGGAGTTGAGCTGATC  |
| 0063 | <i>bceB</i>   | ATGTACGCAGCCATTAAAATATAA  |
| 2936 | <i>ybgB</i>   | AAACTAATGAATCGGCATCTGCGT  |
| 2200 | <i>ywkB</i>   | ATGTACAGCC6ACATTCGCATTTA  |
| 2477 | <i>yxdL</i>   | ATGTGCAGCTCGGATTTGTGTTTC  |
| 2066 | <i>glrBB</i>  | ATGTCAGCAATTTGCCTGTATGCT  |
| 1447 | <i>yknY-2</i> | ATGTAGCAATTTTCAGCTTCTTCCG |
| 1682 | <i>yjkA</i>   | ATGTATTCAATTAATATTGTCACT  |
| 3139 | <i>gerAB</i>  | ATGTTTTGAGTCCTTTGAGCTTAA  |
| 2476 | <i>yxdM</i>   | ATGTGCAAAGCGTGACAATACAAT  |
| 0168 | <i>secDF</i>  | ATGTTCTCAGGCAATTGAGAAAGC  |
| 2381 | <i>cydD</i>   | ATGTAACAACGCTTTACAAGATGG  |
| 3063 | <i>sdpB</i>   | ATGTAGCGATTGAAAAATAAAGAG  |
| 0099 | <i>pomA</i>   | ATGTATCCATCTCGAAATGGAGCG  |
| 2978 | <i>skfF</i>   | ATGTTCCAACATTCATCTGGGATA  |
| 3038 | <i>yvbW</i>   | ATGTGAACCAAGTCAATTCCGTTC  |

---

|      |               |                          |
|------|---------------|--------------------------|
| 1521 | <i>motA</i>   | ATGTGCTCAGCTTGCACGCCGCGA |
| 1951 | <i>crh</i>    | ATGTCCAGGGAGAAGATGAACAAG |
| 2143 | <i>spoIIQ</i> | ATGTAATCAAGTGATCGGAAAATC |
| 0572 | <i>comEA</i>  | ATGTTCTCAGGCAATTGAGAAAGC |
| 0046 | <i>ymtA</i>   | ATGTTGGCAGGAAATTGGCTCTCA |

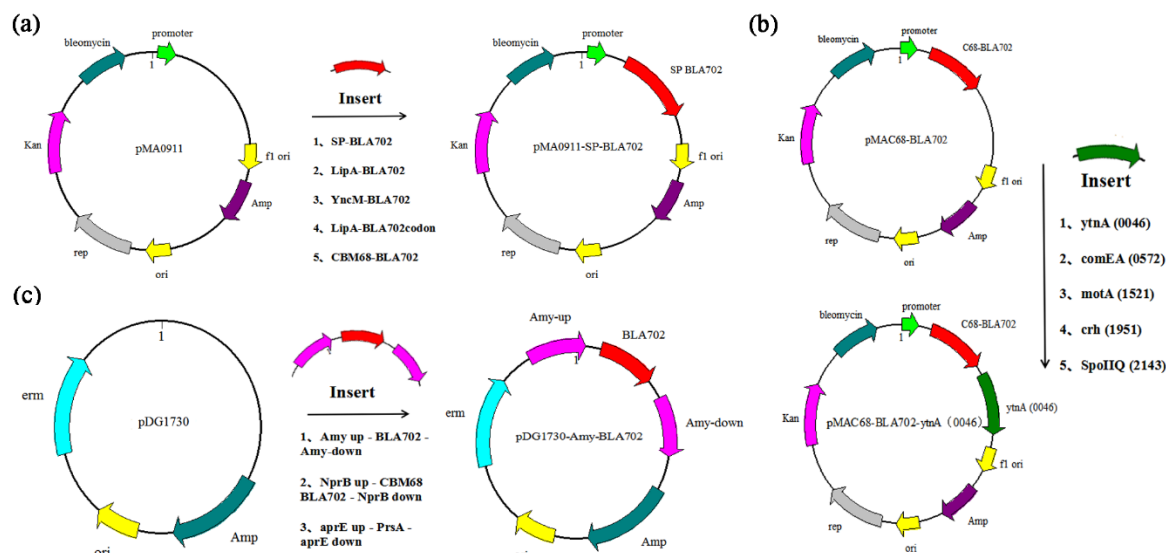

Figure S1. Schematic diagrams of plasmids construction. (a) Plasmids construction for secretory expression of BLA702 guided by different signal peptides or CBM68; (b) Plasmids construction for enhancing the secretory expression of CBM68-BLA702 by overexpressing the key macromolecular protein transporters; (c) Plasmids construction for integrating different target genes into different sites in the genome of *B. subtilis* SCK6 or *B. subtilis* 0127.

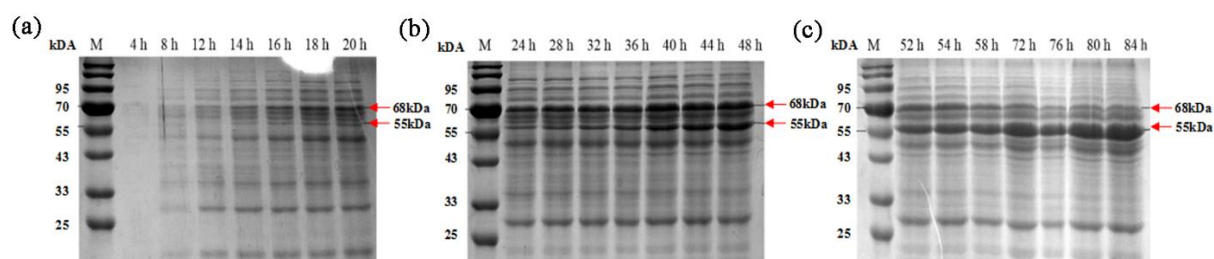

Figure S2. SDS-PAGE of the extracellular proteins of *B. subtilis* SCK6 (pMAC68-BLA702).

(a) 4-20 h fermentation; (b) 24-48 h fermentation; (c) 52-84 h fermentation.

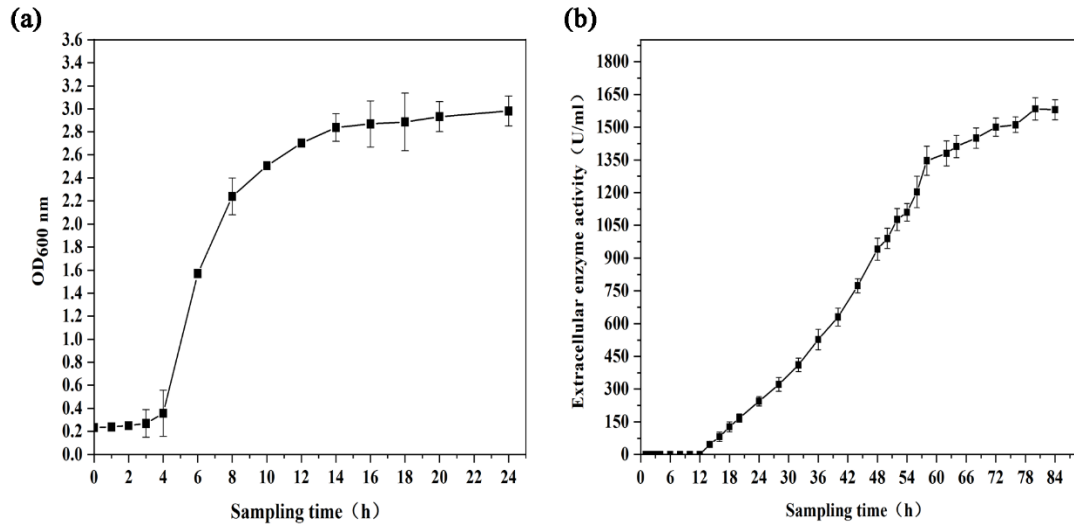

Figure S3. Growth profile (a) and extracellular amylase activity profile (b) of *B. subtilis* SCK6 (pMAC68-BLA702).

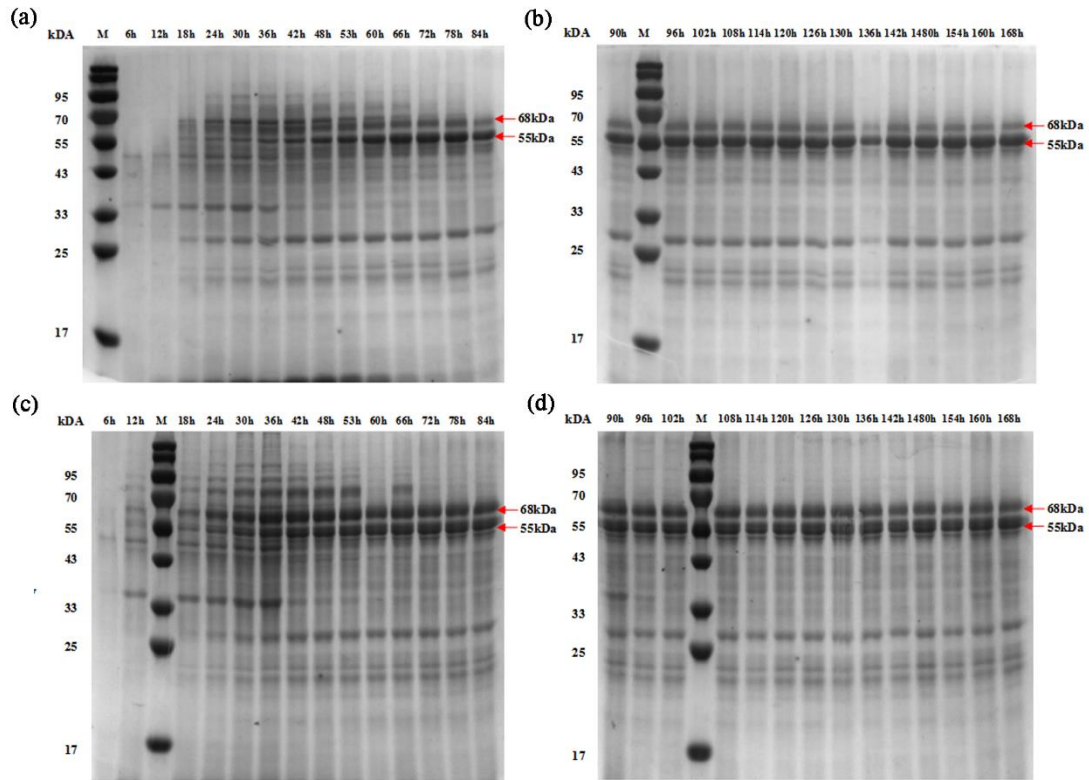

Figure S4. SDS-PAGE of the extracellular proteins of *B. subtilis* 0127 (pMAC68-BLA702) and *B. subtilis* 0127 (AmyE::BLA702-NprB::CBM68-BLA702-PrsA). (a) 6-84 h fermentation of *B. subtilis* 0127 (pMAC68-BLA702); (b) 90-168 h fermentation of *B. subtilis* 0127 (pMAC68-BLA702); (c) 6-84 h fermentation of *B. subtilis* 0127 (AmyE::BLA702-NprB::CBM68-BLA702-PrsA); (d) 90-168 h fermentation of *B. subtilis* 0127 (AmyE::BLA702-NprB::CBM68-BLA702-PrsA).
